# Supplementary material for: Recovery of terephthalic acid from solar PV backsheets using waste solvent from distilled spirits production
Source: Royal Society of Chemistry journal article supplement (doi:10.1039/d5su00581g), 2026-01-01
Supplement: d5su00581g1.xlsx [file d5su00581g1.xlsx]

## Sheet: Sheet1
All masses in grams
Recovered Fluropolymer					*assumption based on paper given						*don't know composition of remaining backsheet
Composition	Time (h)		Date	Backsheet Mass	PVDF Mass	Empty Vial	Filter Paper	Final Mass (total)	Final Mass (Backsheet)		D_f
KOH	1		2024-08-02	0.9966	0.228221	16.3045	0.1382	17.2161	0.7734
KOH	4		2024-08-01	0.9973	0.228382	16.0152	0.1356	16.3386	0.1878
KOH	8		2024-08-01	1.0188	0.233305	16.144	0.1405	16.3864	0.1019
KOH	24		2024-07-31	1.0047	0.230076	16.3604	0.1366	16.531	0.034
NaOH	1		2024-07-24	0.9968	0.228267	16.1253	0.1218	16.8642	0.6171
NaOH	4		2024-07-26	1.0107	0.23145	16.1878	0.1379	16.3864	0.0607
NaOH	8		2024-07-30	1.0016	0.229366	16.1826	0.1397	16.3475	0.0252
NaOH	24		2024-07-25	1.0144	0.232298	16.3763	0.1411	16.5394	0.022
Recovered TPA
Composition	Time (h)		Date	Backsheet Mass	PET Mass	Theoretical TPA	Empty Vial	Filter Paper	Final Mass (total)	Final Mass (TPA)		D_PET (%)
KOH	1		2024-08-02	0.9966	0.768379	0.66433	16.2101	0.138	16.5466	0.1985		29.8797
KOH	4		2024-08-01	0.9973	0.768918	0.664796	16.5512	0.1369	17.4783	0.7902		118.863
KOH	8		2024-08-01	1.0188	0.785495	0.679128	16.181	0.1388	17.029	0.7092		104.428
KOH	24		2024-07-31	1.0047	0.774624	0.669729	16.1203	0.1389	17.0512	0.792		118.257
NaOH	1		2024-07-24	0.9968	0.768533	0.664463	16.0108	0.1413	16.4691	0.317		47.7077
NaOH	4		2024-07-26	1.0107	0.77925	0.673729	16.3349	0.138	17.2843	0.8114		120.434
NaOH	8		2024-07-30	1.0016	0.772234	0.667663	16.219	0.1397	17.1844	0.8257		123.67
NaOH	24		2024-07-25	1.0144	0.782102	0.676195	16.3786	0.1397	17.3371	0.8188		121.089
